# Supplementary material for: Functional analysis of the role of hydrogen sulfide in the regulation of dark-induced leaf senescence in Arabidopsis
Source: PubMed Central journal article supplement (PMC5454012; doi:10.1038/s41598-017-02872-0), 2017-06-01
Supplement: 41598_2017_2872_MOESM1_ESM.pdf [file 41598_2017_2872_MOESM1_ESM.pdf]

## Supplementary information

### Functional analysis of the role of hydrogen sulfide in the regulation of dark-induced leaf senescence in Arabidopsis

Bo Wei<sup>a</sup>, Wei Zhang<sup>a</sup>, Jin Chao<sup>a</sup>, Tianru Zhang<sup>a</sup>, Tingting Zhao<sup>a</sup>, Graham Noctor<sup>b</sup>, Yongsheng Liu<sup>a,\*</sup> and Yi Han<sup>a,\*</sup>

<sup>a</sup> School of Food Science and Engineering, Hefei University of Technology, Hefei, Anhui, 230009 China.

<sup>b</sup> Institute of Plant Sciences Paris Saclay, Université Paris-Sud, Centre National de la Recherche Scientifique, Institut National de la Recherche Agronomique, Université Evry, Paris Diderot, Sorbonne Paris-Cité, Université Paris-Saclay, 91405 Orsay, France

\*To whom correspondence should be addressed E-mail: yi.han@hfut.edu.cn and liuyongsheng1122@hfut.edu.cn

**Supplementary Table S1.** Sequences of primers used in this work.

| Locus     | Oligonucleotide | Sequence (5' → 3')            | Restriction enzyme | Purpose         |
|-----------|-----------------|-------------------------------|--------------------|-----------------|
| AT1G69490 | NAP-F           | CGAAGCAGAGAGAAGAAGTCAA        |                    | RT-qPCR         |
|           | NAP-R           | CAAATGAGCCAGCGAACAC           |                    |                 |
| AT4G22920 | SGR1-F          | GGGAAAATGTCGCTCACG            |                    | RT-qPCR         |
|           | SGR1-R          | AGCCTTCAACACCACAGGTAG         |                    |                 |
| AT5G13800 | PPH-F           | AATCCCCAACGCTCCATACT          |                    | RT-qPCR         |
|           | PPH-R           | CTTCAAACCACCAGACTCCA          |                    |                 |
| AT3G44884 | PAO-F           | CCCAGGCAGACCGTTTTGT           |                    | RT-qPCR         |
|           | PAO-R           | TGACTCTTACCATGCCGTCTGA        |                    |                 |
| AT4G13250 | NYC1-F          | GCAGAGAACAGGACGAGGTT          |                    | RT-qPCR         |
|           | NYC1-R          | CGCAAACAACAGAAAGAGAGAA        |                    |                 |
| AT5G04900 | NOL-F           | CCGACTTACATCCGTTTCCTAA        |                    | RT-qPCR         |
|           | NOL-R           | CTGTTCTTCCTTGCTCCCAAC         |                    |                 |
| AT1G19670 | CLH1-F          | CCCGTCGTTTTATTCTTCCA          |                    | RT-qPCR         |
|           | CLH1-R          | AGCATCGTCCACTTCCACTT          |                    |                 |
| AT5G43860 | CLH2-F          | ACAAAAGGGATTAGAGGGAAGAG       |                    | RT-qPCR         |
|           | CLH2-R          | GATACAACAAGTCCACCAACGA        |                    |                 |
| AT4G37000 | RCCR-F          | CGCCGAAAATTTATGGAGTT          |                    | RT-qPCR         |
|           | RCCR-R          | AGGGAAGGAGTTGTGATTGG          |                    |                 |
| AT5G45890 | SAG12-F         | GGCGTTTTTCAGCGTTGCGG          |                    | RT-qPCR         |
|           | SAG12-R         | CCGCCTTCGCAGCCAAAATCG         |                    |                 |
| AT3G10985 | SAG20-F         | TCGGTAACGTTGTTGCTGGA          |                    | RT-qPCR         |
|           | SAG20-R         | ACCAAATCTTTCAAATCGCCA         |                    |                 |
| AT4G30270 | SEN4-F          | GACTCTTCTCGTGCGGCGT           |                    | RT-qPCR         |
|           | SEN4-R          | CCCACGGCCATTCCCCAAGC          |                    |                 |
| AT3G18780 | ACTIN2-F1       | CTGTACGGTAACATTGTGCTCAG       |                    | RT-qPCR         |
|           | ACTIN2-R1       | CCGATCCAGACACTGTACTTCC        |                    |                 |
| AT5G28030 | DES1-F1         | GGATTGGTTTAGCCAGCATC          |                    | RT-PCR          |
|           | DES1-R1         | CACCAGAGCCTATTCCCTTGG         |                    |                 |
| AT3G18780 | ACTIN2-F2       | CTGTGCCAATCTACGAGGGT          |                    | RT-PCR          |
|           | ACTIN2-R2       | TGCTCATAACGTCAGCGATA          |                    |                 |
| AT5G28030 | DES1-F2         | TCTAGA ATGGAAGACCGCTCTGATC    |                    | over expression |
|           | DES1-R2         | CTCGAG CTACTCATCAACTGGCAAATTC |                    |                 |
| AT4G23100 | CAD2-F          | AGCATTTCACTTGAACCTGG          | <i>BsI</i>         | Genotyping      |
|           | CAD2-R          | TCCTTGTCAGTGTCTGTCC           |                    |                 |
| AT3G19190 | ATG2-F          | GCACTTTCCATCAGCTACTCG         |                    | Genotyping      |
|           | ATG2-R          | CATTCGAGGTTCTGGCCTAAC         |                    |                 |
| AT5G17290 | ATG5-F          | GCTAATTGCACAAAGCTTACCTC       |                    | Genotyping      |
|           | ATG5-R          | TGATATGCCTAACATCGTCCAC        |                    |                 |
| AT3G62770 | ATG18A-F        | AACCCTAATCCCGATTCCAC          |                    | Genotyping      |
|           | ATG18A-R        | ACATGGACCGTTCCCTTTGTC         |                    |                 |
| AT5G43940 | gsnor1-F        | TTCGAATGACACGAAAATCG          |                    | Genotyping      |
|           | gsnor1-R        | TAAGCGTCGGTGTGACAAAG          |                    |                 |

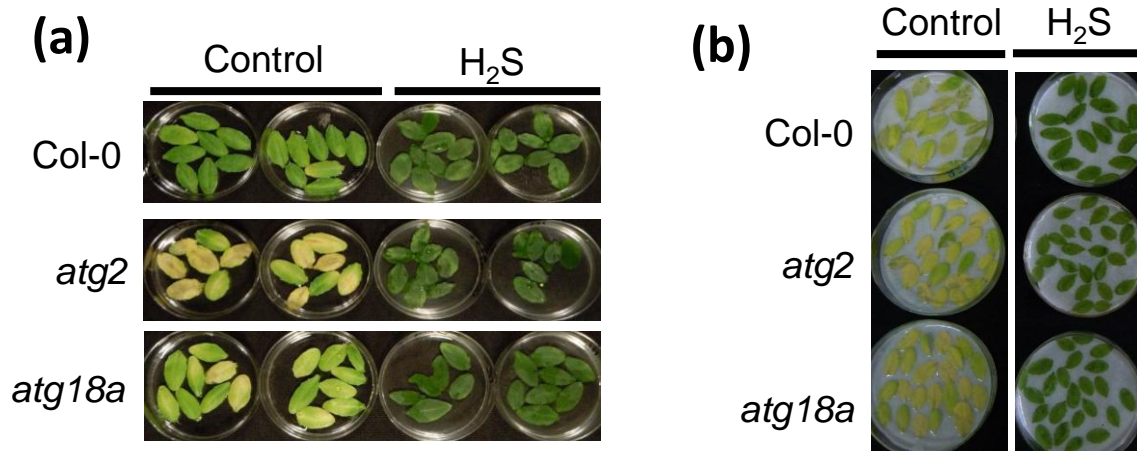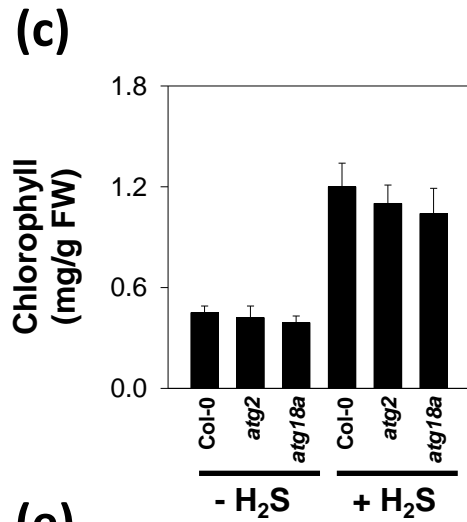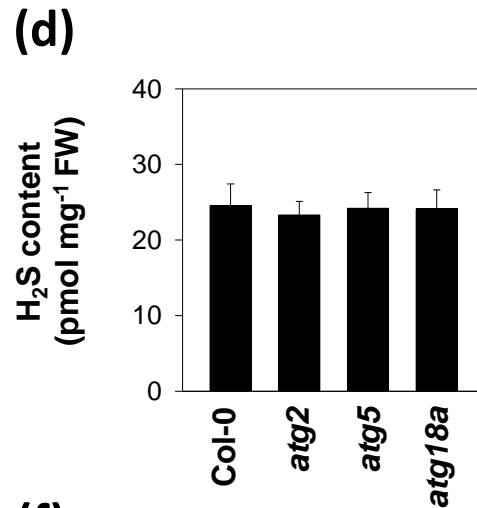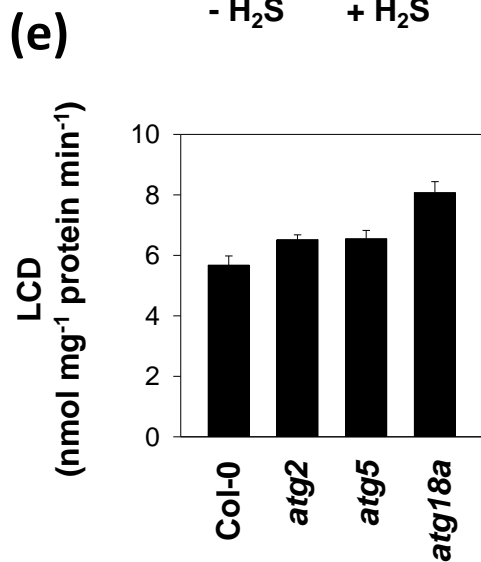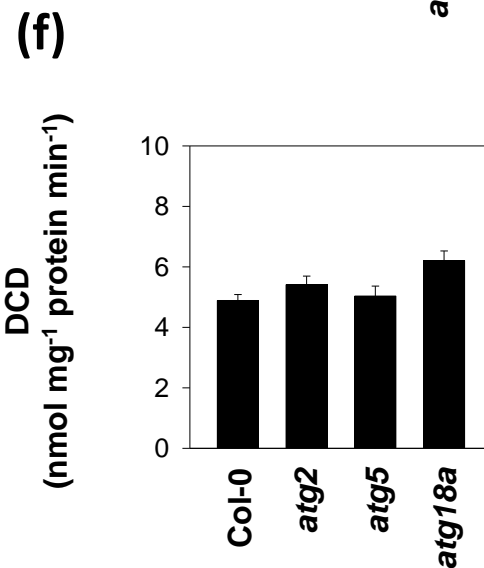

**Supplementary Figure S1.** Analyses of the interplay between autophagy and H<sub>2</sub>S in the regulation of chlorophyll breakdown during extended darkness. (a) and (b), Phenotype of *atg2* and *atg18a* detached leaves treated with or without 0.5 mM H<sub>2</sub>S, respectively, under extended darkness for 2 d or 4 d. (c), Effect of H<sub>2</sub>S on chlorophyll contents of autophagy deficient mutants (*atg2* and *atg18a*) under extended darkness for 4 d. + and - indicate detached leaves of wild-type and autophagy mutants fumigated with or without 0.5 mM NaHS respectively. (d) to (f), H<sub>2</sub>S content, LCD and DCD activities in *atg2*, *atg5*, and *atg18a* mutant. Data are means  $\pm$  SE of at least three independent samples from different plants.

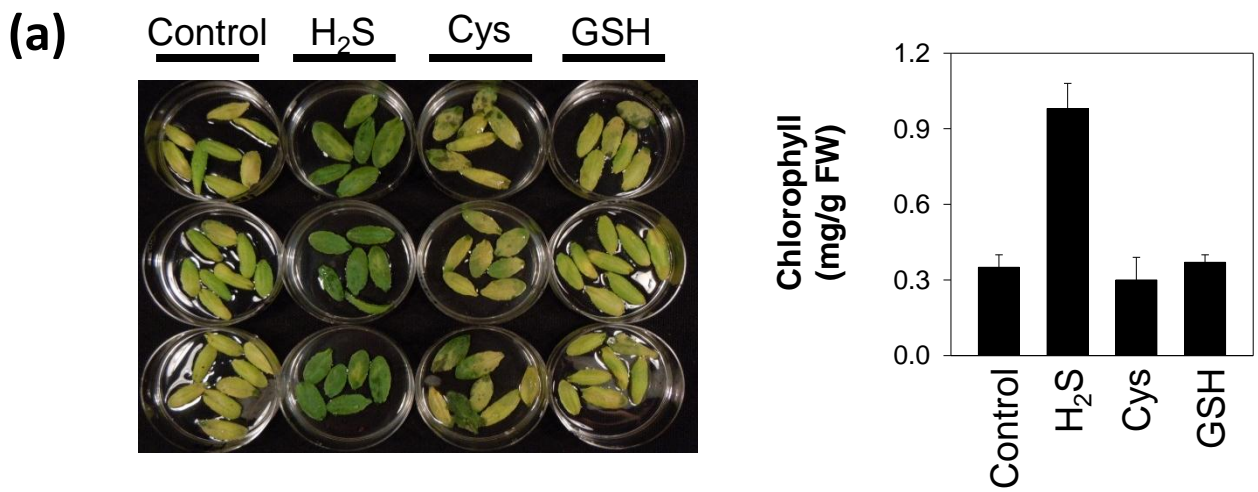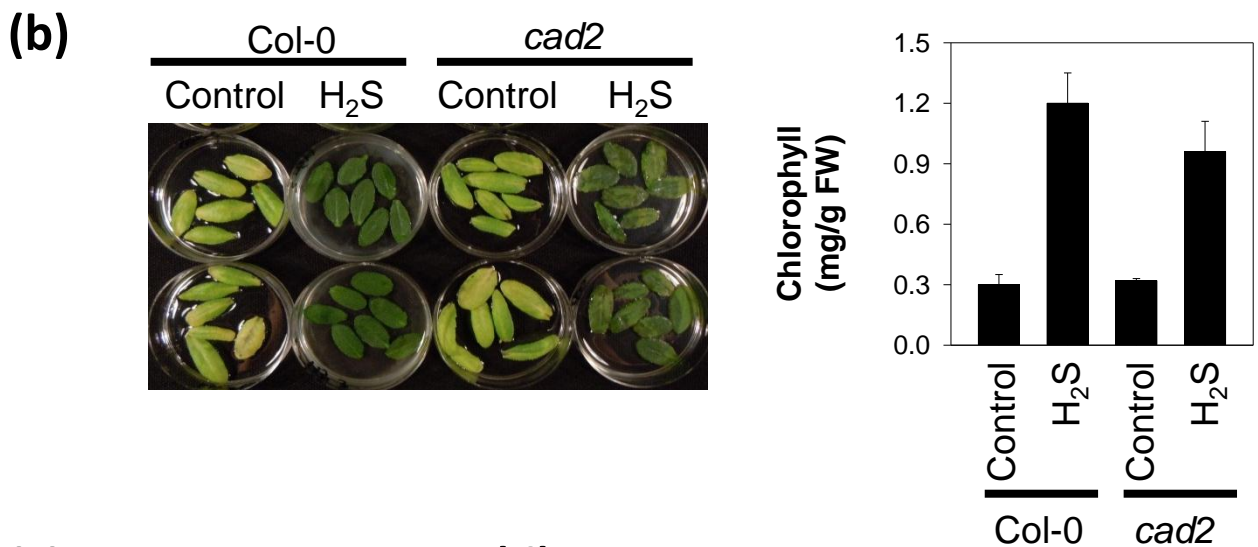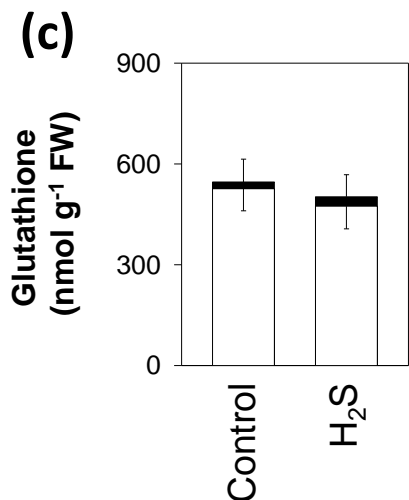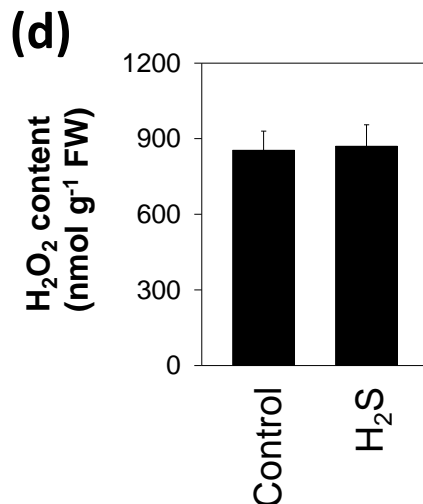

**Supplementary Figure S2.** Effects of H<sub>2</sub>S-linked components on chlorophyll degradation, glutathione and H<sub>2</sub>O<sub>2</sub> level, during extended darkness. (a), effects of exogenous applied cysteine with 0.1 mM or glutathione with 0.1 mM on dark-induced leaf color and chlorophyll breakdown and in detached leaves. (b), phenotype of detached leaves and chlorophyll contents in Col-0 and *cad2* treated with or without H<sub>2</sub>S under extended darkness for 4 d. (c), glutathione level in detached leaves of wild type plants treated with or without H<sub>2</sub>S under extended darkness for 4 d. Reduce glutathione (white bars) and oxidized form (black bars). (d), H<sub>2</sub>O<sub>2</sub> content. Samples were taken from the detached leaves at 4 d of darkness in the presence or absence of H<sub>2</sub>S.

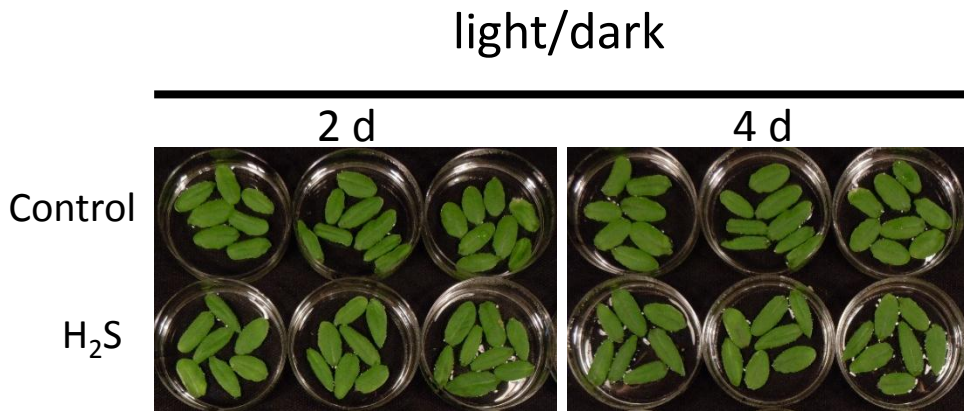

**Supplementary Figure S3.** Effects of H<sub>2</sub>S exposure on phenotype of detached leave of Col-0 under regular light/dark conditions.

Transcript abundance (relative to ACTIN2)

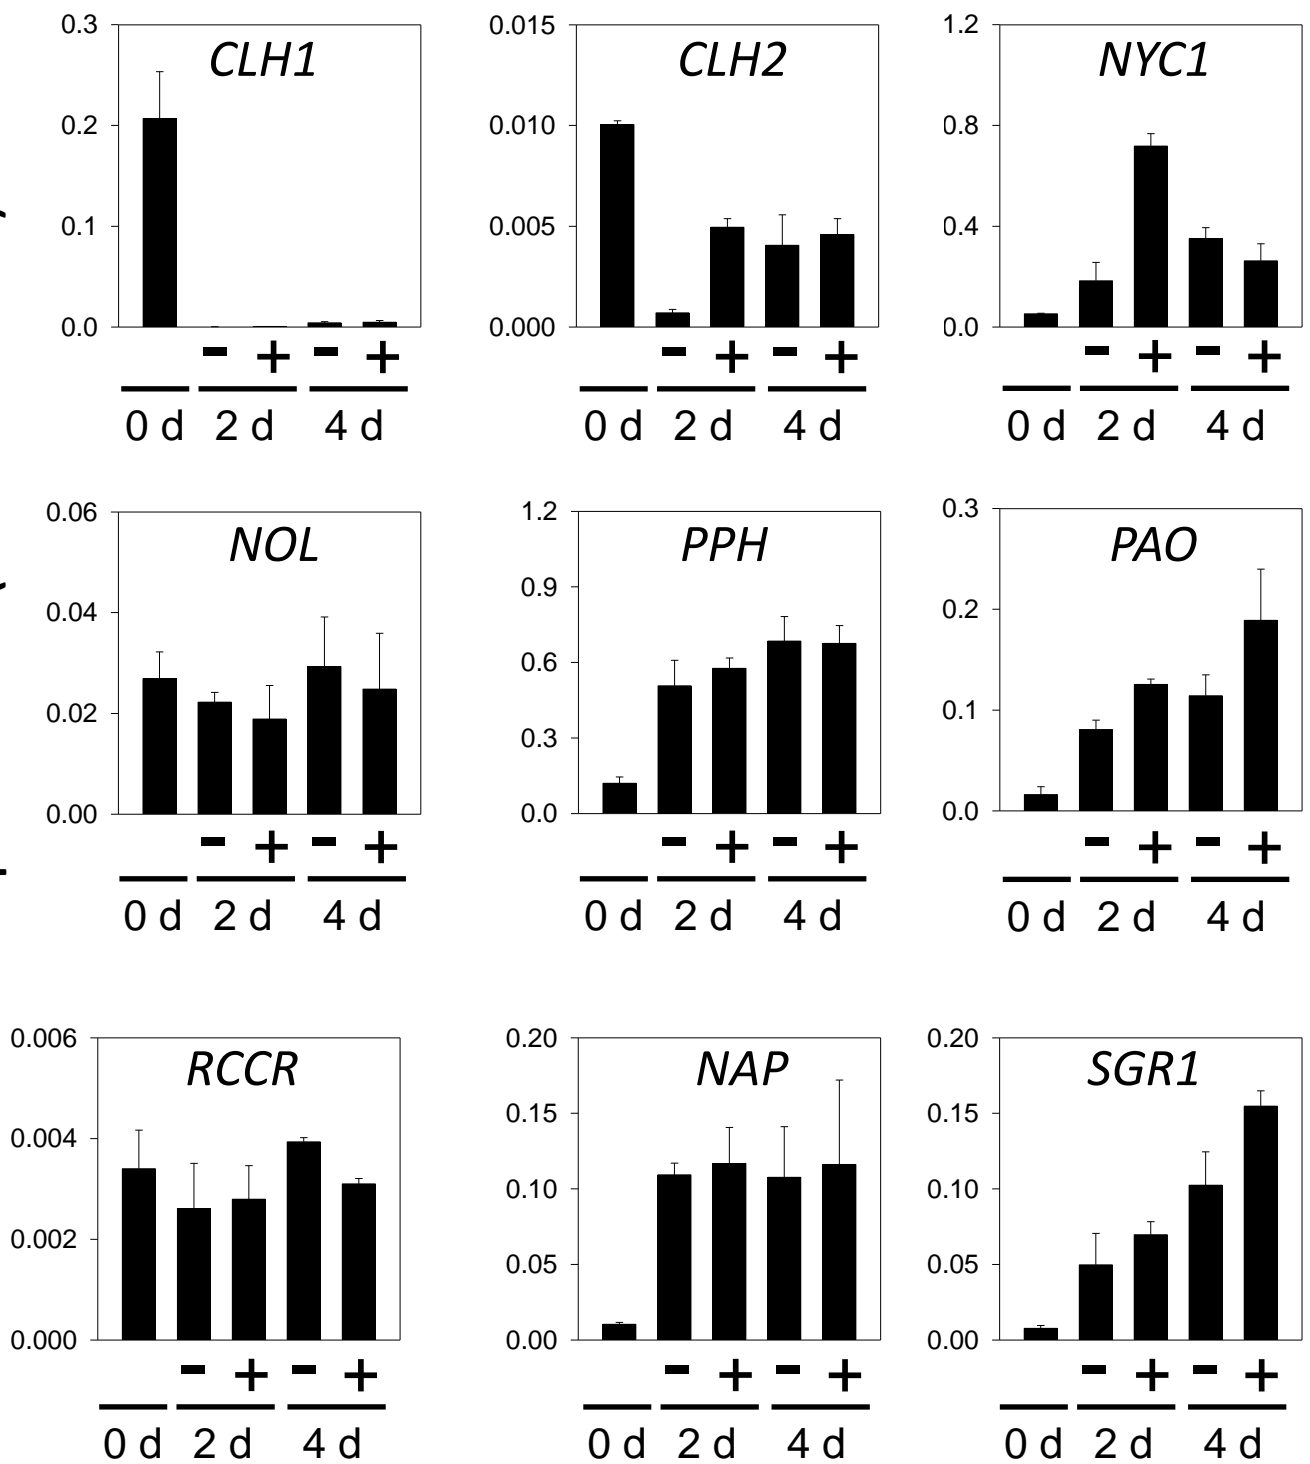

**Supplementary Figure S4.** Relative transcript levels of chlorophyll catabolic genes in H<sub>2</sub>S-treated detached leaves during extended darkness. *CLH1* (*CHLOROPHYLLASE 1*), *CLH2* (*CHLOROPHYLLASE 2*), *NYC1* (*NON-YELLOW COLORING 1*), *NOL* (*NYC1-LIKE*), *PPH* (*PHEOPHYTINASE*), *PAO* (*PHEOPHORBIIDE A OXYGENASE*), *RCCR* (*RED CHLOROPHYLL CATABOLITE REDUCTASE*), *NAP* (*NAC-LIKE, ACTIVATED BY AP3/PI*), *SGR1* (*STAY-GREEN1*). + and - indicate entire plants treated with or without 0.5 mM NaHS, respectively, during dark incubation. Data are means  $\pm$  SE of at least three independent samples from different plants.

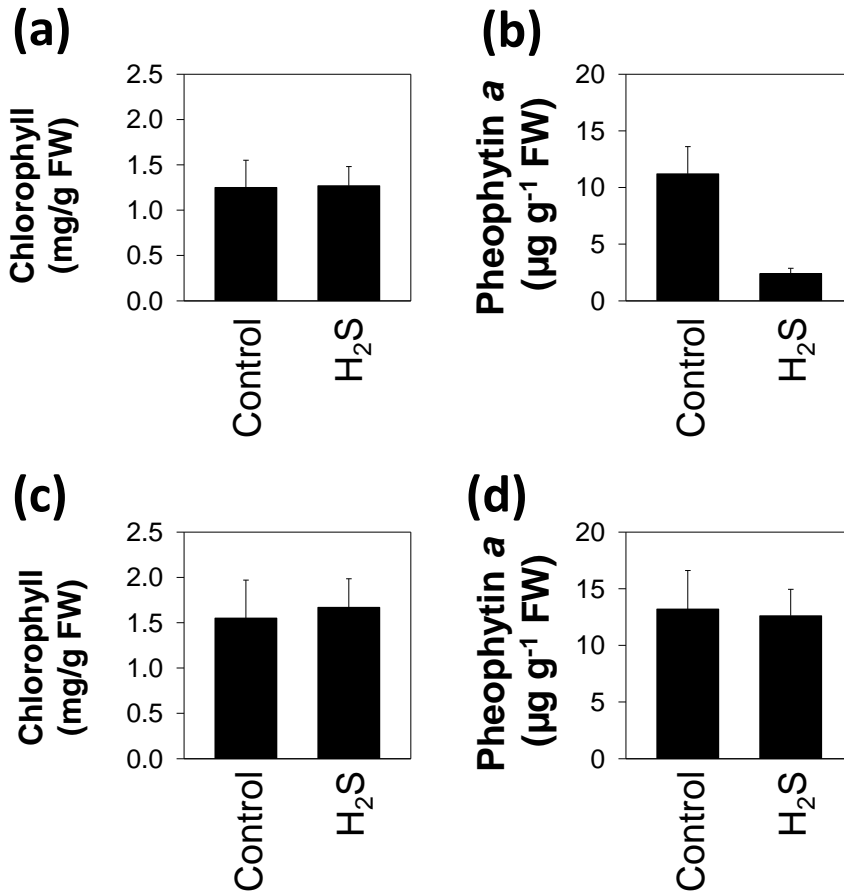

**Supplementary Figure S5.** Effects of H<sub>2</sub>S exposure on the levels of chlorophyll and pheophytin *a* of attached leaves of Col-0 under prolonged darkness and regular growth conditions. (a), Chlorophyll, samples were taken from attached leaves of Col-0 at 2 d of darkness treatment. (b) Pheophytin *a*, samples were taken from attached leaves of Col-0 at 1 d regular growth conditions after transfer from 2 d of dark/H<sub>2</sub>S treatment. (c), Chlorophyll content. (d), pheophytin *a* level. samples were taken from attached leaves of Col-0 at 3 d of regular growth conditions. Wild-type plants were fumigated with or without 0.5 mM NaHS respectively. Data are means  $\pm$  SE of at least three independent samples from different plants.

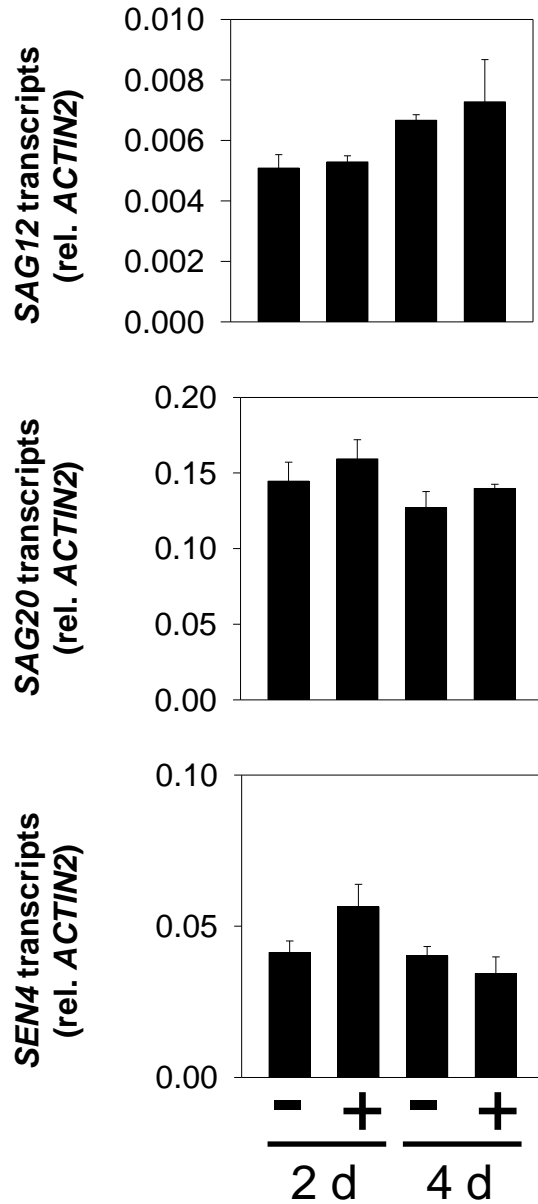

**Supplementary Figure S6.** Effects of H<sub>2</sub>S exposure on SAG expression in attached leaves under normal growth conditions. + and - indicate entire plants fumigated with or without 0.5 mM NaHS, respectively, during growth. Data are means  $\pm$  SE of at least three independent samples from different plants.



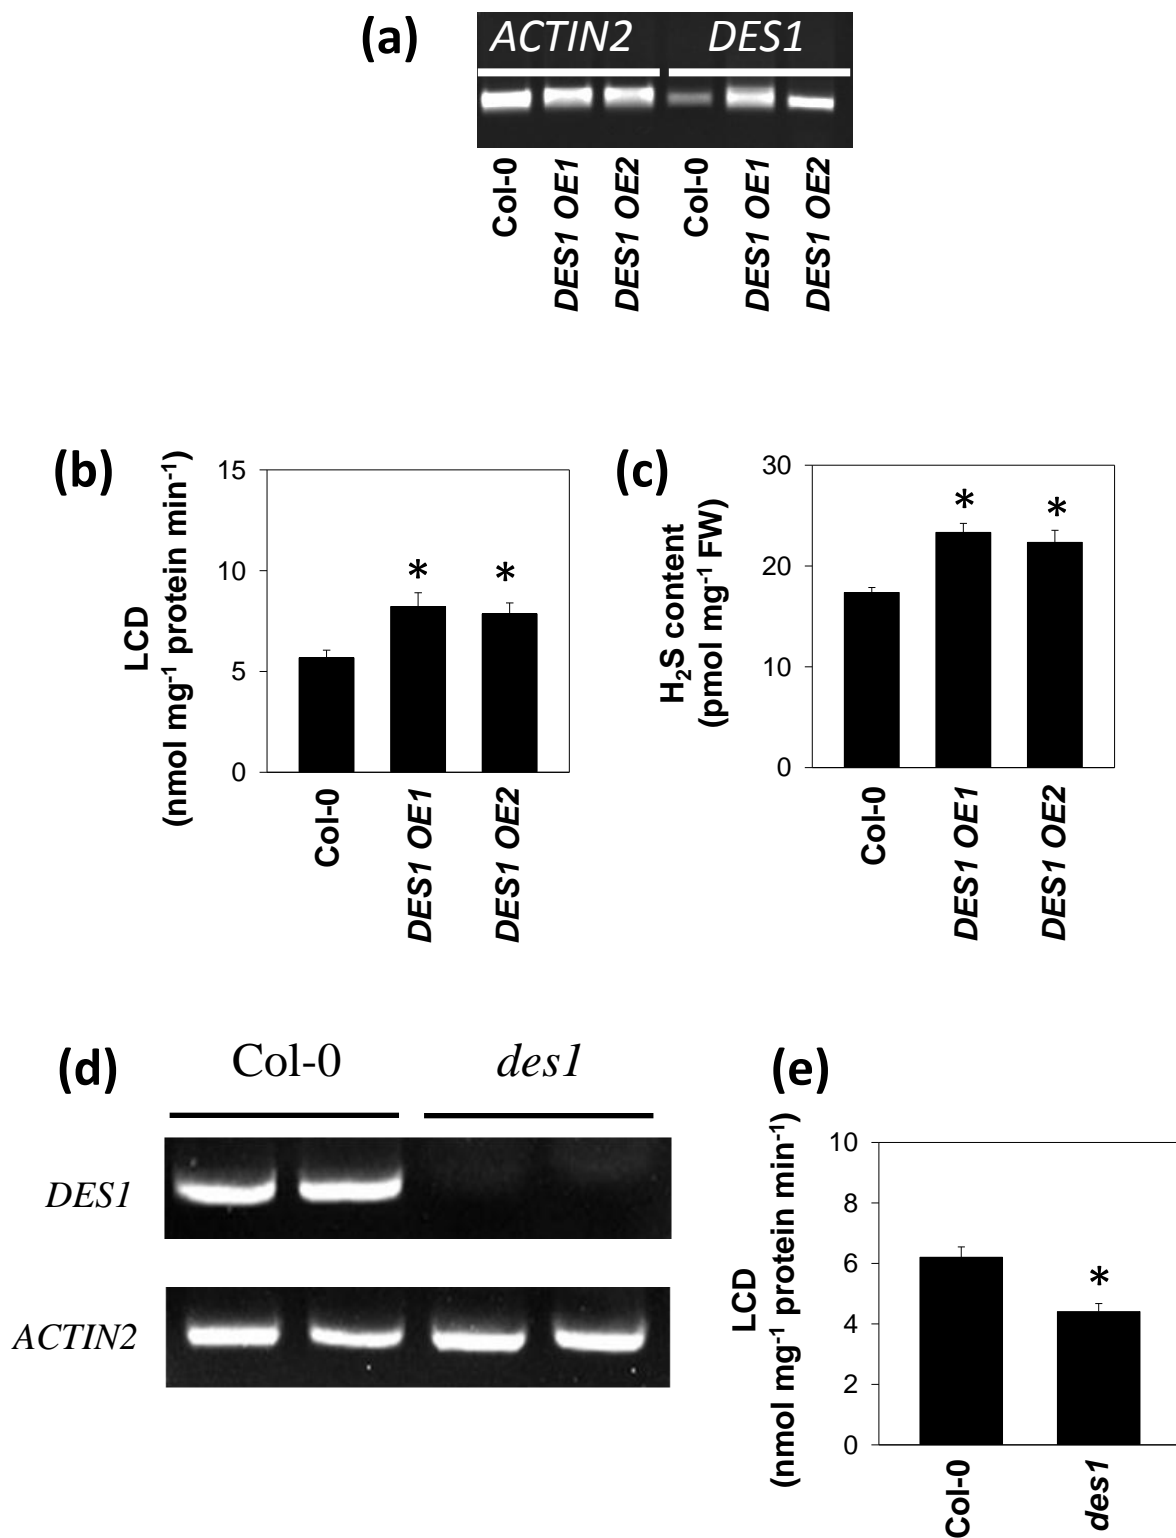

**Supplementary Figure S7.** Identification and characterization of *DES1* transgenic lines and *des1* mutant. RT-PCR for *DES1* expression (a), LCD activity (b) and DCD activity (c) are determined in two independent *DES1* transgenic lines. RT-PCR for *DES1* expression and LCD activity of *des1* mutant are shown in (d) and (e) respectively. Data are means  $\pm$  SE of at least three independent samples from different plants. Asterisks indicate significant difference from the wild type at the same time point at  $P < 0.05$ , using the Student's *t* test.

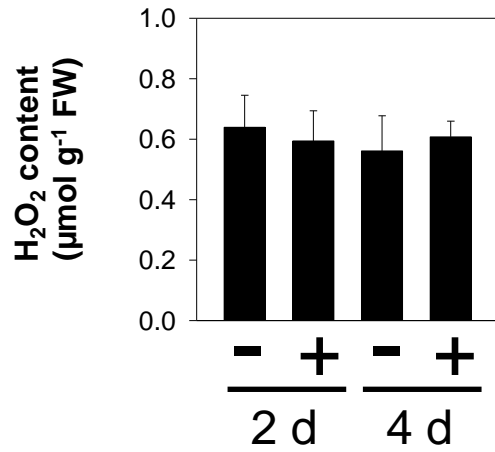

**Supplementary Figure S8.** Effects of H<sub>2</sub>S exposure on H<sub>2</sub>O<sub>2</sub> content in attached leaves of Col-0 under normal growth conditions. + and - indicate entire plants fumigated with or without or with 0.5 mM NaHS, respectively, during growth. Data are means  $\pm$  SE of at least three independent samples from different plants.

(a)

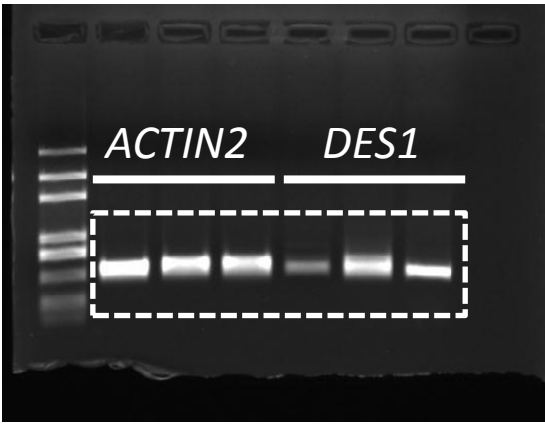

(b)

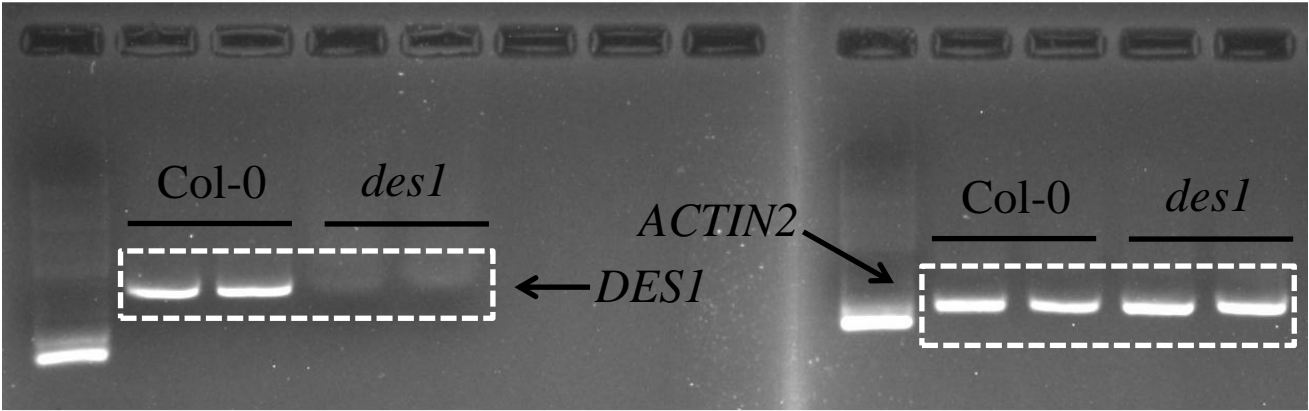

**Supplementary Figure S9.** Full-length image of supplementary Figure S7a (a) and supplementary Figure S7 d (b) . White dotted lines indicate the cropping locations.
